# Supplementary material
Source: Springer Nature journal article supplement (https://www.springermedizin.de/resource/supplementary/13024_2011_224_MOESM2_ESM.pdf/9643690)

**Vehicle**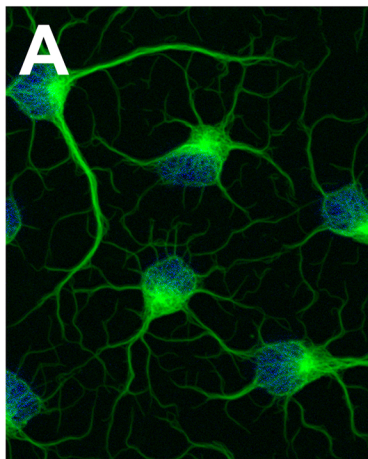**p35**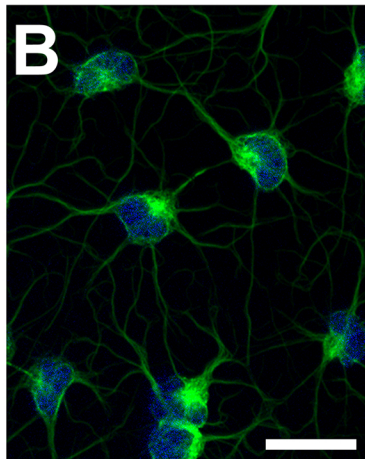**C**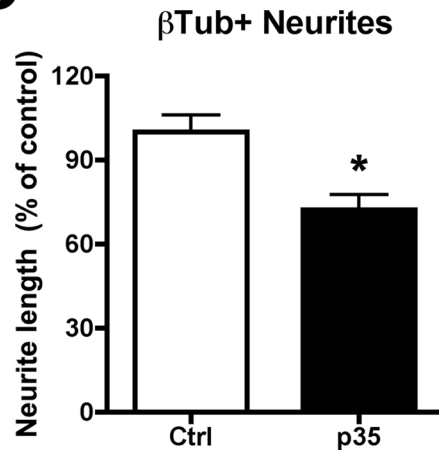**D**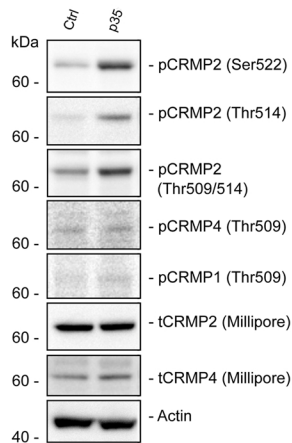**E**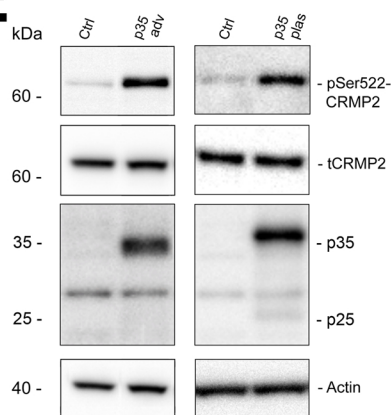**F**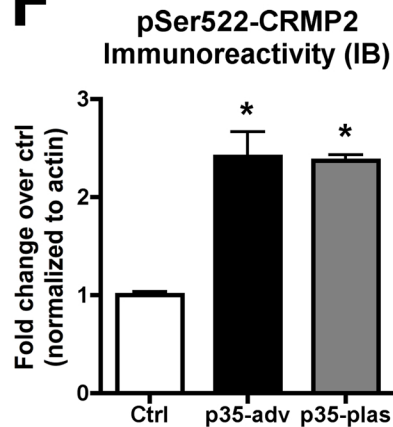

Supplement: MOESM2 [file 9643690]
